# Supplementary material
Source: PubMed Central journal article supplement (PMC514520)
Supplement: 7600347s1.pdf [file 7600347s1.pdf]

**Supplementary Figure 1.** Interaction of the amino-terminal half of PRC1 and the carboxyl-terminal half of KIF4 in the yeast two-hybrid system. Yeast strain AH109 was cotransformed with pGBKT7-PRC1-N (aa 1-303) and/or pGADT7-Rec-KIF4-C (aa 663-1232), and transformants containing these plasmids were selected by growth on SD/-Leu, SD/-Trp and SD/-Leu/-Trp agar plates. Protein-protein interactions were determined by growth in the absence of adenine and histidine (SD/-Leu/-Trp/-Ade/-His).

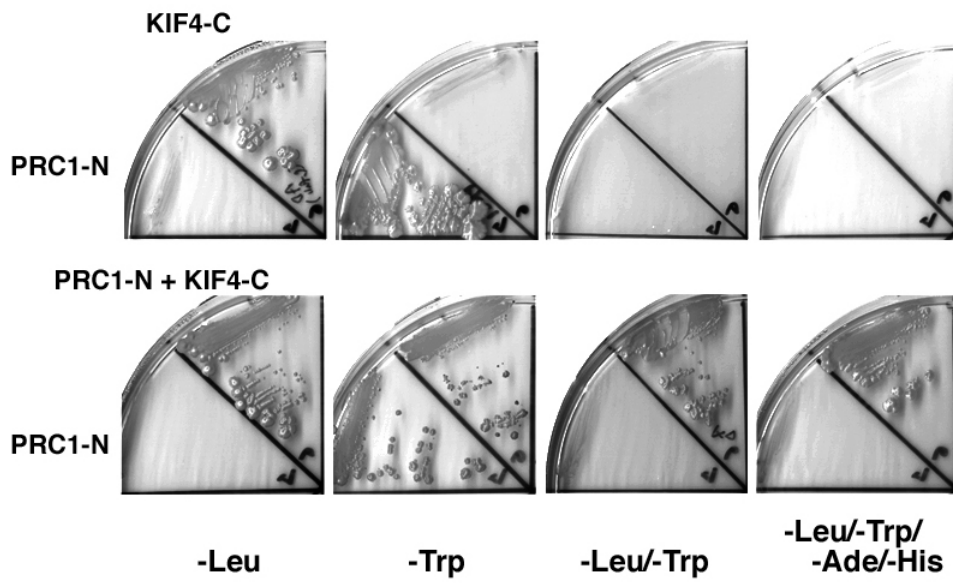

**Supplementary Figure 1**
