# Supplementary material
Source: PubMed Central journal article supplement (PMC514520)
Supplement: 7600347s2.pdf [file 7600347s2.pdf]

**Supplementary Figure 2.** Localization of PRC1, KIF4, CENP-E, MKLP1 and Aurora B in colcemid-treated anaphase cells. HeLa cells were treated with 1  $\mu\text{g/ml}$  aphidicolin for 15 hrs and released for 10.5 hrs to enrich the late mitotic cells, and then treated with 10  $\mu\text{g/ml}$  colcemid for 20 min. Cells at anaphase were stained with anti-PRC1, anti-KIF4, anti-CENP-E, anti-MKLP1 and anti-Aurora B antibodies. Scale bar, 5  $\mu\text{m}$ .

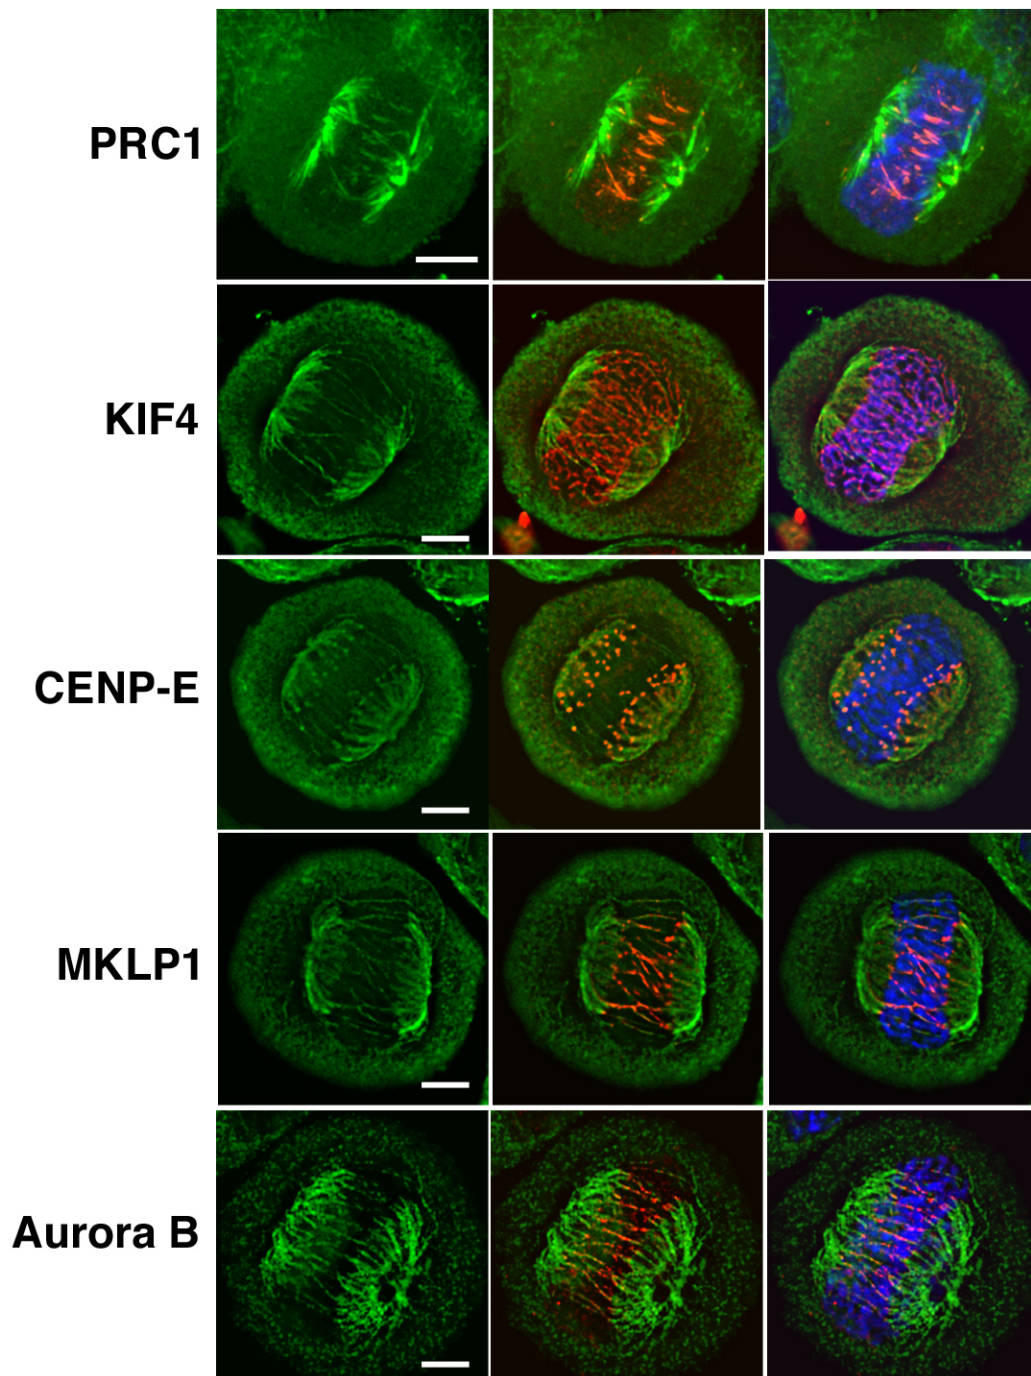

**Supplementary Figure 2**
