# Supplementary material
Source: PubMed Central journal article supplement (PMC514520)
Supplement: 7600347s3.pdf [file 7600347s3.pdf]

**Supplementary Figure 3.** Overexpression of YFP-fused phosphorylation-null PRC1 in KIF4-deficient cells. Following the treatment of KIF4 siRNA or control RNA for 22 hrs, HeLa cells were transfected with YFP-fused phosphorylation-null PRC1 mutant (pEYFP-PRC1(T470A, T481A)) for 33 hrs, and were stained with DNA (blue) and tubulin (red) (**A**) or KIF4 (red) (**B**). Scale bar, 5  $\mu$ m.

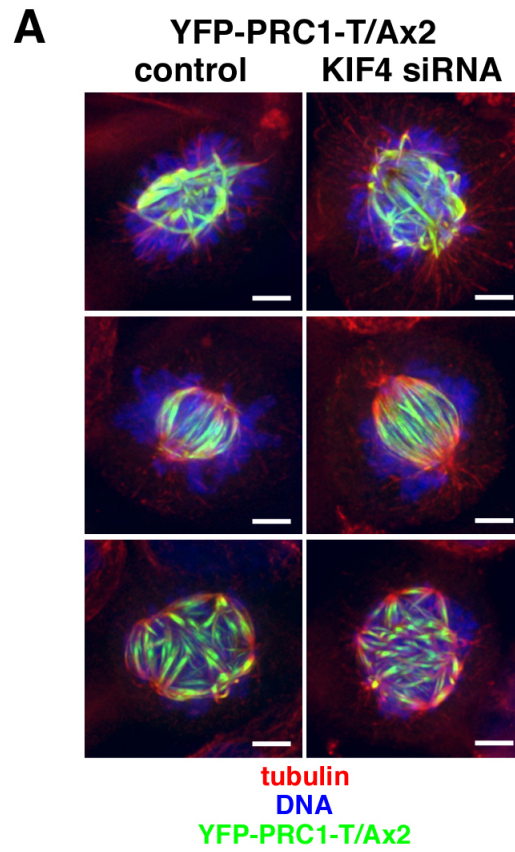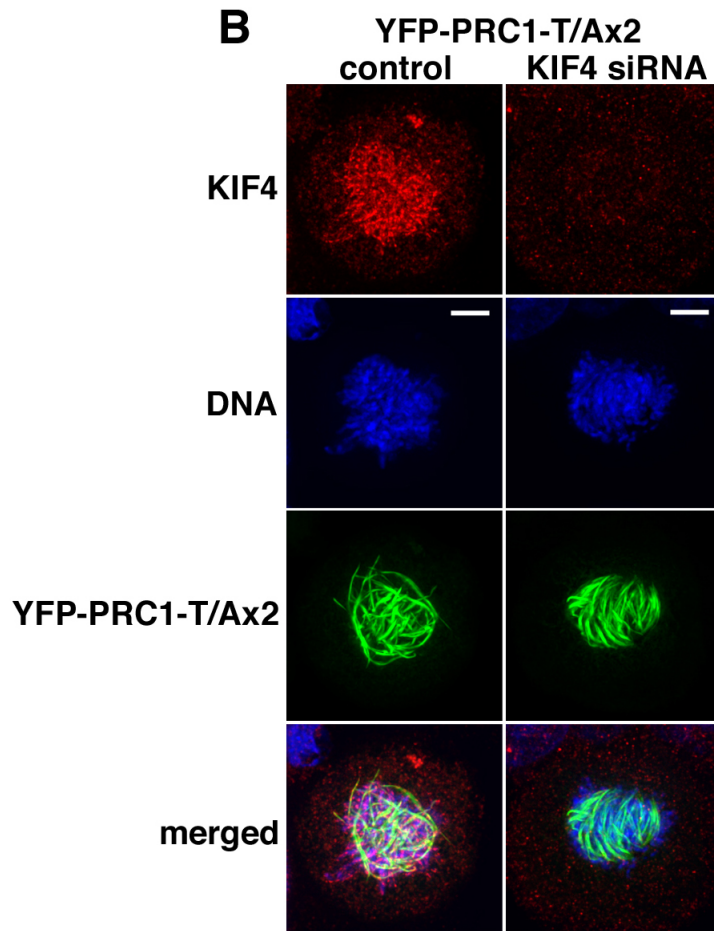

**Supplementary Figure 3**
